# Supplementary material for: On the evaporation kinetics of [60] fullerene in aromatic organic solvents
Source: Royal Society of Chemistry journal article supplement (doi:10.1039/c8cp01076e), 2018-01-01

### Supporting Information:

#### 1. DFT calculations of clathrate inner radius:

DMOl3 (Materials Studio) DFT calculations were conducted with fine quality using LDA/PWC functions to achieve geometry optimization utilizing structural symmetry. DFT-D correction method for OBS was also applied to our calculations. The acceptable tolerances were set at  $1\text{e-}5$  (Ha) for energy,  $0.002$  (Ha/Å) for maximum force, and  $0.005$  Å for maximum displacement during geometry optimization. Once structural geometry was optimized, the DOS (Density of States), and ED (Electron Density) were calculated. After plotting the ED for each of the three cases calculated (namely,  $\text{C}_{60}$  interacting with benzene, toluene, and chlorobenzene) the best fit plane was determined and the length along the plane from the  $\text{C}_{60}$  molecule till the end of the electron cloud was taken as the inner radius for the  $\text{C}_{60}$ /solvent clathrate (see figures below).

Below, are the figures and the determined values for the inner radii:

#### a. $\text{C}_{60}$ /Benzene: $r_i=0.8$ nm

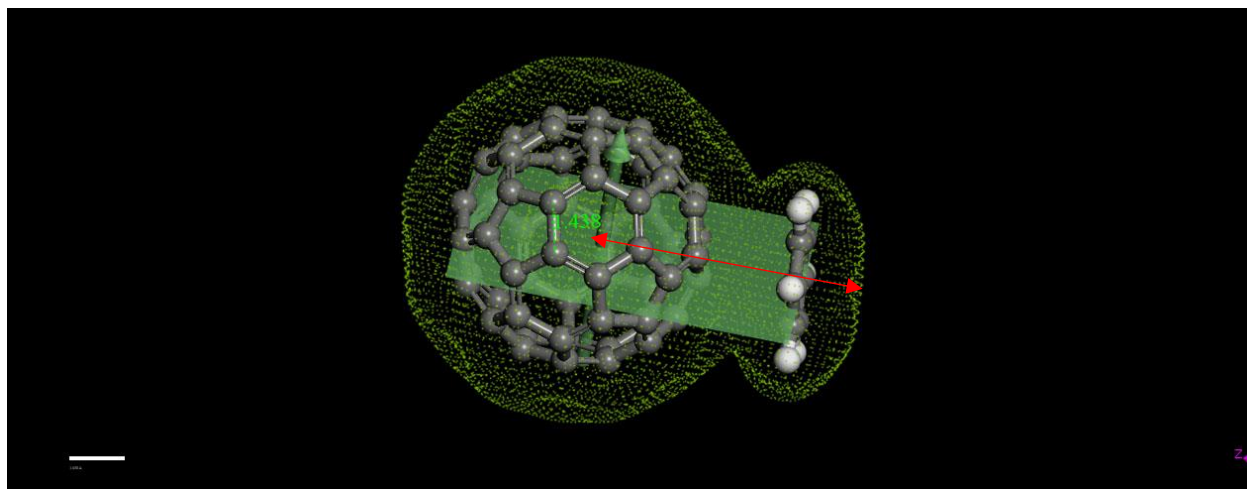

#### b. $\text{C}_{60}$ /Toluene: $r_i=0.85$ nm

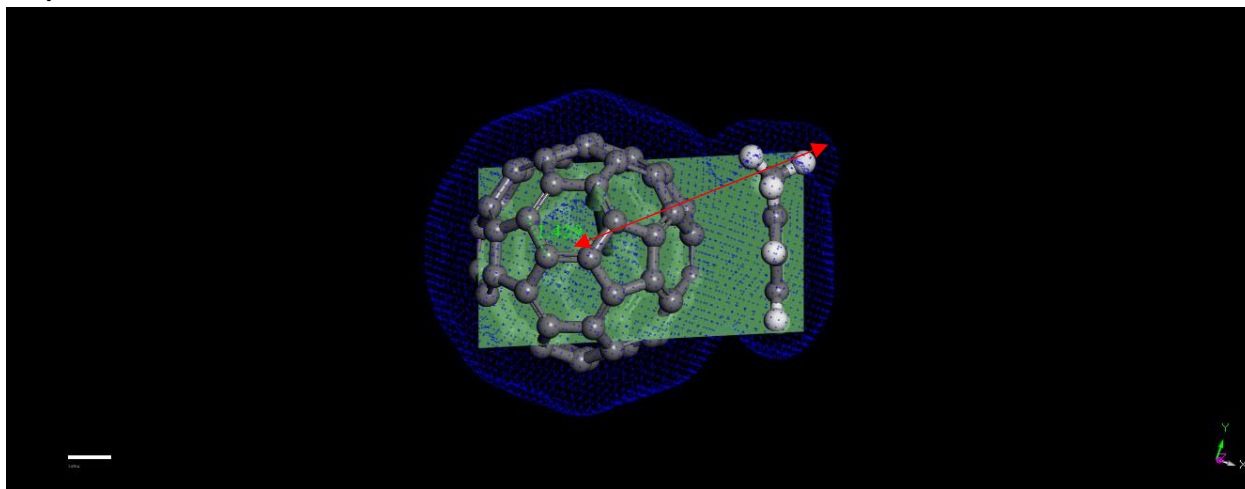

c.  $C_{60}$ /Chlorobenzene:  $r_i=1.05$  nm

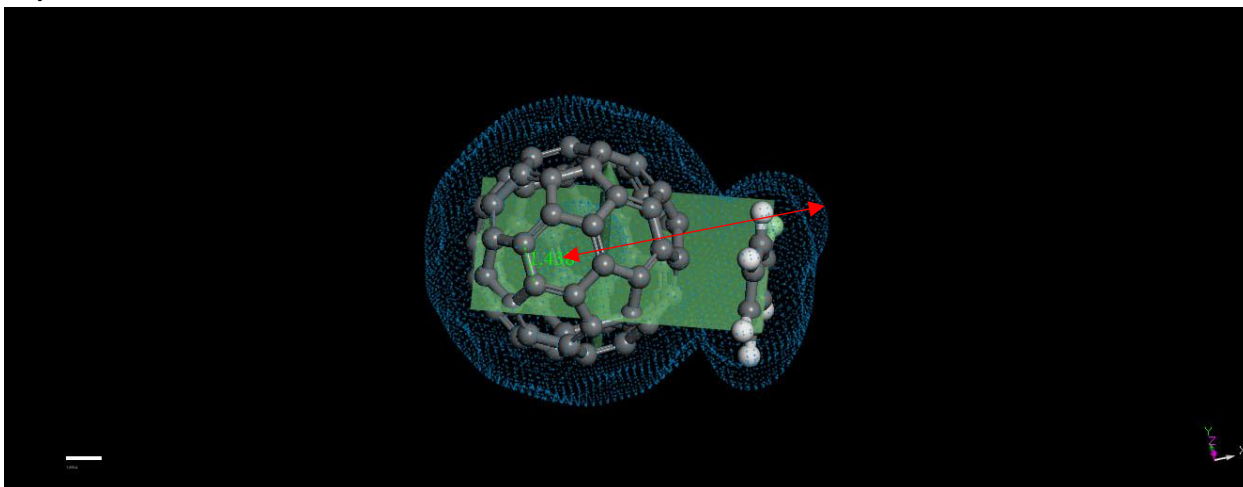

## 2. Example calculations of the outer radius of the toluene solvent clathrate (spherical shell).

Maximum evaporation rate occurred at  $C_{60}$  mole fraction of  $1.48 \times 10^{-4}$  (see Fig. 3),

Mole fraction =  $\#C_{60}/\#(\text{Solvent} + C_{60})$

For 1 fullerene molecule,

# solvent =  $(1/\text{mole fraction}) - 1$   
 $= (1/1.48e-4) - 1 = 6755$  molecule.

# toluene mole = # molecules / Avogadro's No.  
 $= 6755 / 6.022e23 = 1.12e-20$  mole

Volume of toluene shell = # toluene moles \* toluene molar volume  
 $= 1.12e-20 \text{ (mol)} * 92.14 \text{ (cm}^3/\text{mol.)}$   
 $= 1.034e-18 \text{ (cm}^3\text{)}$

This volume is a spherical shell around the fullerene solvent clathrate

Shell volume =  $Shell\ Volume = \frac{4}{3}\pi(r_o^3 - r_i^3)$

Using  $r_i$  from DFT calculations as 0.85 nm, and solving for  $r_o$  gives;  
 $r_o = 6.6$  nm

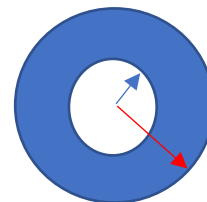

Supplement: c8cp01076e1.pdf [file c8cp01076e1.pdf]
